# Supplementary material for: Influence of Clinical Decontamination Techniques on the Surface Characteristics of SLA Titanium Implant
Source: MDPI journal article supplement (doi:10.3390/nano12244481), 2022-12-18
Supplement: s1 [file s1]

**Table S3.** Pairwise comparison of Rt between groups via post hoc analysis. Dunn Bonferroni Test \* $p < 0.05$  \*\* $p < 0.01$ .

| Rt                                               | Control | Laser   | Laser + H <sub>2</sub> O <sub>2</sub> | Laser + CHX | Ti Brush | Ti Brush+ H <sub>2</sub> O <sub>2</sub> | Ti Brush + CHX | Ti Curette | Ti Curette + H <sub>2</sub> O <sub>2</sub> | Ti Curette+ CHX |
|--------------------------------------------------|---------|---------|---------------------------------------|-------------|----------|-----------------------------------------|----------------|------------|--------------------------------------------|-----------------|
| <b>Control</b>                                   | -       |         |                                       |             |          |                                         |                |            |                                            |                 |
| <b>1.Laser</b>                                   | 1.000   | -       |                                       |             |          |                                         |                |            |                                            |                 |
| <b>2.Laser + H<sub>2</sub>O<sub>2</sub></b>      | 1.000   | 1.000   | -                                     |             |          |                                         |                |            |                                            |                 |
| <b>3.Laser + CHX</b>                             | 1.000   | 1.000   | 1.000                                 | -           |          |                                         |                |            |                                            |                 |
| <b>4.Ti Brush</b>                                | 1.000   | 0.002** | 0.009**                               | 0.004**     | -        |                                         |                |            |                                            |                 |
| <b>5.Ti Brush+ H<sub>2</sub>O<sub>2</sub></b>    | 1.000   | 1.000   | 1.000                                 | 1.000       | 1.000    | -                                       |                |            |                                            |                 |
| <b>6.Ti Brush + CHX</b>                          | 1.000   | 0.004** | 0.018*                                | 0.009**     | 1.000    | 1.000                                   | -              |            |                                            |                 |
| <b>7.Ti Curette</b>                              | 1.000   | 1.000   | 1.000                                 | 1.000       | 1.000    | 1.000                                   | 1.000          | -          |                                            |                 |
| <b>8.Ti Curette + H<sub>2</sub>O<sub>2</sub></b> | 0.040*  | 0.001** | 0.006**                               | 0.003**     | 1.000    | 1.000                                   | 1.000          | 1.000      | -                                          |                 |
| <b>9.Ti Curette + CHX</b>                        | 1.000   | 1.000   | 1.000                                 | 1.000       | 1.000    | 1.000                                   | 1.000          | 1.000      | 1.000                                      | -               |

**Table S4.** Pairwise comparison of contact angle parameters between groups via post hoc analysis. Dunn Bonferroni Test \* $p < 0.05$  \*\* $p < 0.01$ .

| Contact Angle                                    | Negative Control | Positive Control | Laser   | Laser + H <sub>2</sub> O <sub>2</sub> | Laser + CHX | Ti Brush | Ti Brush+ H <sub>2</sub> O <sub>2</sub> | Ti Brush + CHX | Ti Curette | Ti Curette + H <sub>2</sub> O <sub>2</sub> | Ti Curette+ CHX |
|--------------------------------------------------|------------------|------------------|---------|---------------------------------------|-------------|----------|-----------------------------------------|----------------|------------|--------------------------------------------|-----------------|
| <b>Negative control</b>                          | -                |                  |         |                                       |             |          |                                         |                |            |                                            |                 |
| <b>Positive control</b>                          | 1.000            | -                |         |                                       |             |          |                                         |                |            |                                            |                 |
| <b>1.Laser</b>                                   | 1.000            | 1.000            | -       |                                       |             |          |                                         |                |            |                                            |                 |
| <b>2.Laser + H<sub>2</sub>O<sub>2</sub></b>      | 0.001**          | 1.000            | 0.848   | -                                     |             |          |                                         |                |            |                                            |                 |
| <b>3.Laser + CHX</b>                             | 1.000            | 1.000            | 1.000   | 1.000                                 | -           |          |                                         |                |            |                                            |                 |
| <b>4.Ti Brush</b>                                | 1.000            | 1.000            | 1.000   | 1.000                                 | 1.000       | -        |                                         |                |            |                                            |                 |
| <b>5.Ti Brush+ H<sub>2</sub>O<sub>2</sub></b>    | 0.001**          | 0.136            | 0.006** | 1.000                                 | 0.780       | 0.039*   | -                                       |                |            |                                            |                 |
| <b>6.Ti Brush + CHX</b>                          | 0.001**          | 1.000            | 0.872   | 1.000                                 | 1.000       | 1.000    | 1.000                                   | -              |            |                                            |                 |
| <b>7.Ti Curette</b>                              | 1.000            | 1.000            | 1.000   | 1.000                                 | 1.000       | 1.000    | 0.027*                                  | 1.000          | -          |                                            |                 |
| <b>8.Ti Curette + H<sub>2</sub>O<sub>2</sub></b> | 0.001**          | 0.252            | 0.001** | 1.000                                 | 1.000       | 0.001**  | 1.000                                   | 1.000          | 1.000      | -                                          |                 |
| <b>9.Ti Curette + CHX</b>                        | 0.001**          | 1.000            | 0.304   | 1.000                                 | 1.000       | 1.000    | 1.000                                   | 1.000          | 0.947      | 0.001**                                    | -               |
